# Supplementary material
Source: PubMed Central journal article supplement (PMC8554636)
Supplement: NIHMS1721845-supplement-Supplemental_information.pdf [file NIHMS1721845-supplement-Supplemental_information.pdf]

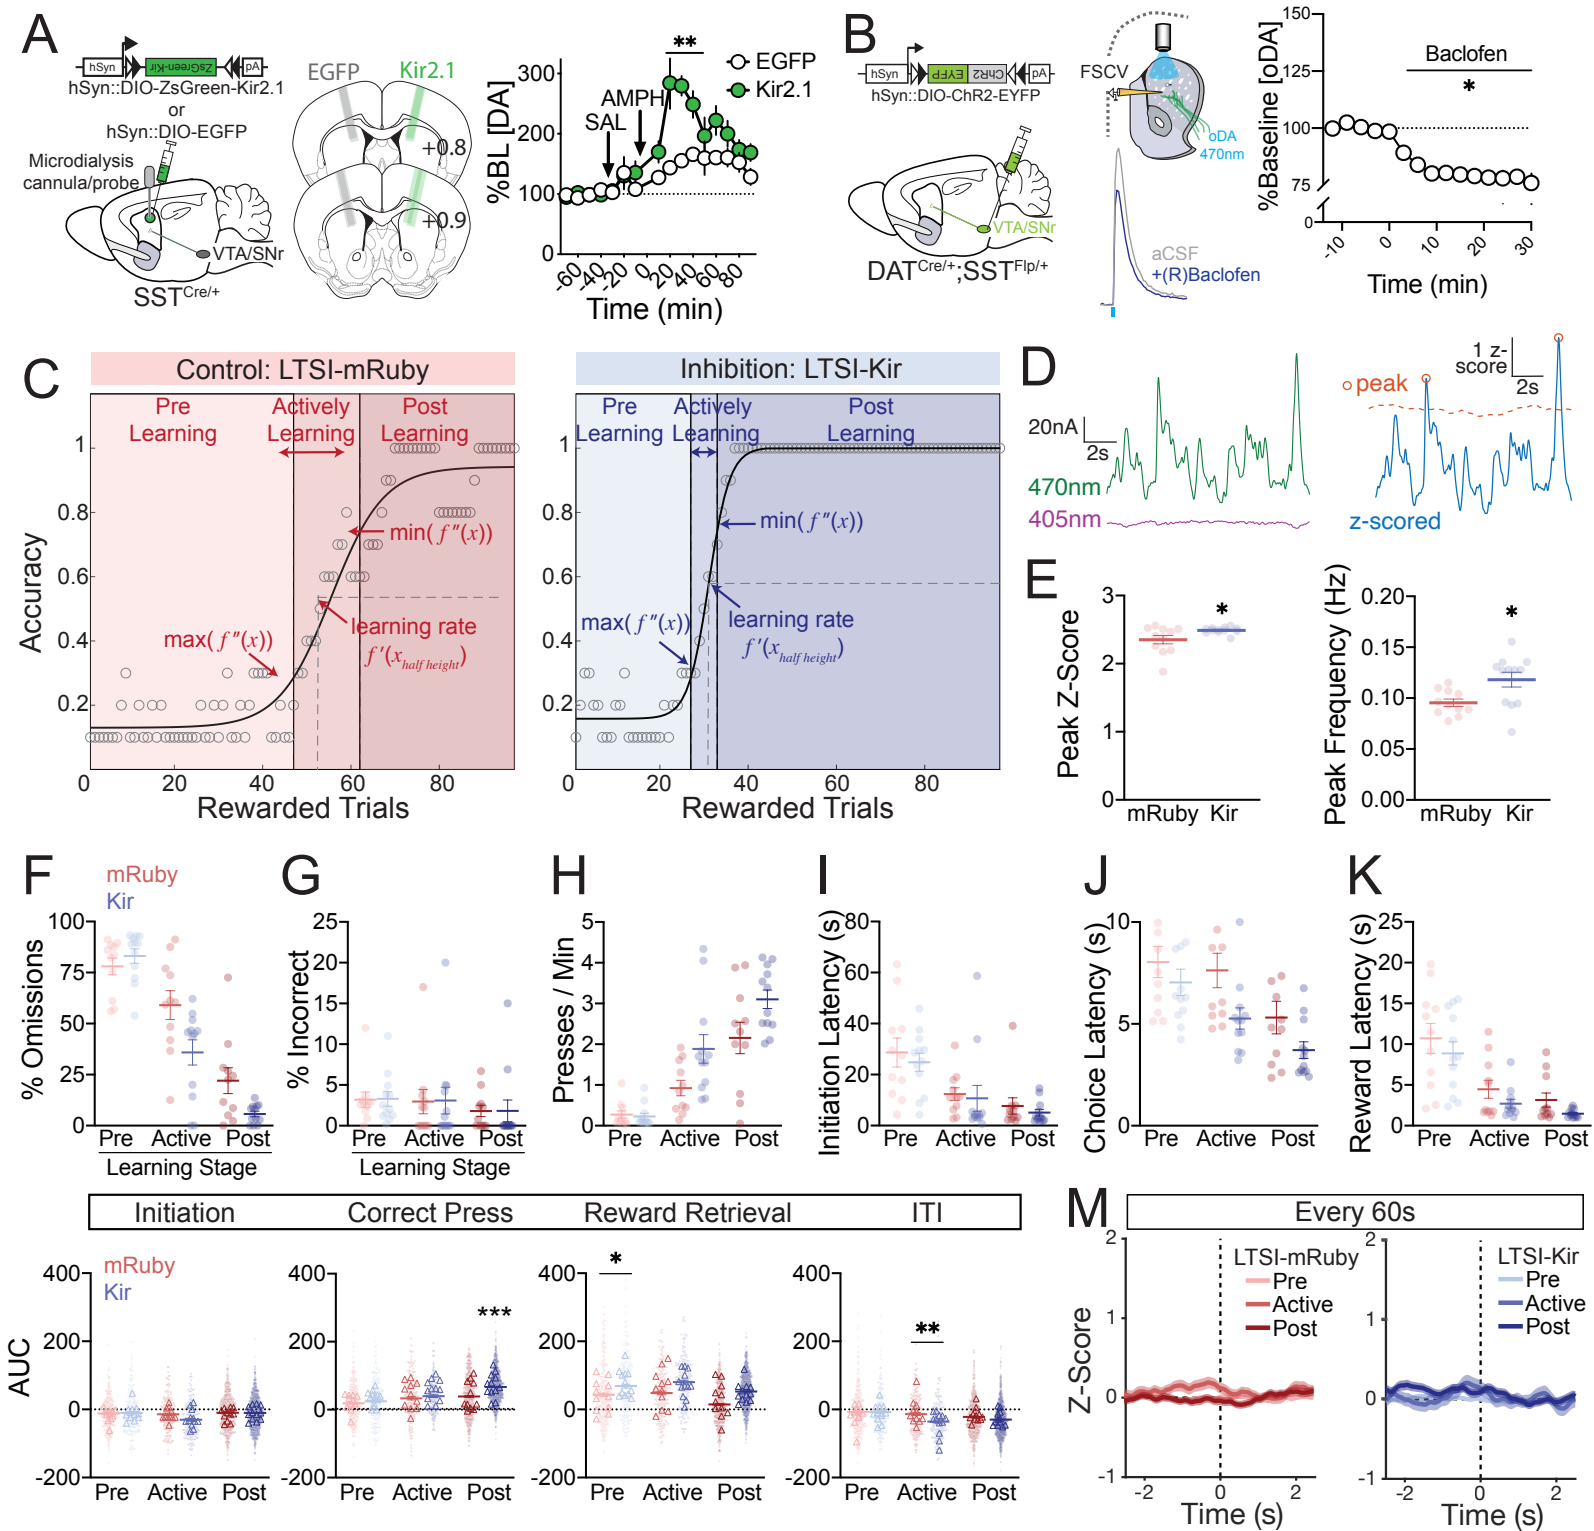

**Figure S1. LTSl inhibition amplifies dopamine and accelerates operant learning; related to Figures 1 and 2.** (A) Experimental design for *in vivo* microdialysis experiment (left), and probe placements (right) for 4 mice expressing EGFP in the LTSlS of one hemisphere (gray) and Kir2.1 in LTSlS of the other hemisphere (green). LTSl inhibition significantly augments the extracellular dopamine response to d-amphetamine (AMPH, 1.0 mg/kg, i.p) (right). \*\* $p < 0.01$  vs baseline. (B) Experimental design for *in vitro* fast scan cyclic voltammetry experiment (left). Application of 100 $\mu$ M (+R)Baclofen significantly suppresses optogenetically-evoked dopamine (right). \* $p < 0.05$  vs baseline. (C) Sample sigmoidal models of learning for a mouse expressing LTSl-mRuby (left) and LTSl-Kir (right). (D) Example traces of raw (left) and transformed (z-scored  $\Delta F/F$ , see methods; right). Peaks above a moving threshold (orange dotted line, see methods) are indicated by orange dots. (E) Peak z-score (left) and frequency (right) in the 10min baseline period prior to the operant task of mice expressing LTSl-mRuby (control, n=11) or LTSl-Kir (inhibition, n=12). \*\* $p < 0.01$ , \*\*\* $p < 0.001$  vs LTSl-mRuby. (F-G) Proportion of (F) omissions (initiations without lever press), and (G) incorrect lever presses in pre-learning, active learning, and post-learning periods. (H) Rate of lever presses across learning stages. (I-K) Latencies to (I) initiate, (J) press a lever, and (K) retrieve reward across learning stages. (L) Total area under the curve (AUC) of the PETH for the 1s before and after behavioral events. (M) PETHs aligned to timestamps every 60s as opposed to behavioral events. \*\* $p < 0.01$ , \*\*\* $p < 0.001$  vs mRuby control at the same learning stage. Lines in dot plots represent mean and dots represent individual data points. All other data represented as mean  $\pm$  SEM. See Data S1 for detailed statistics.

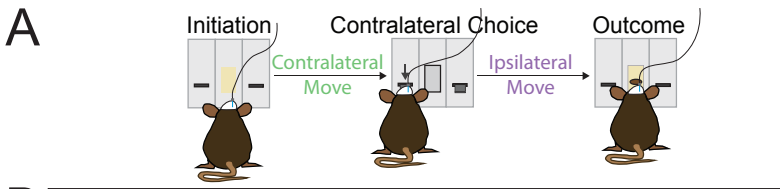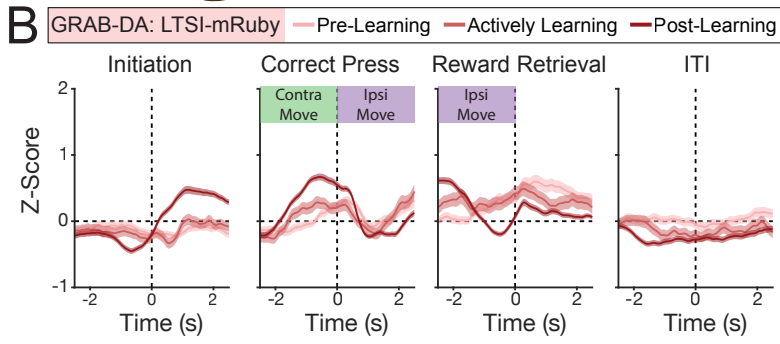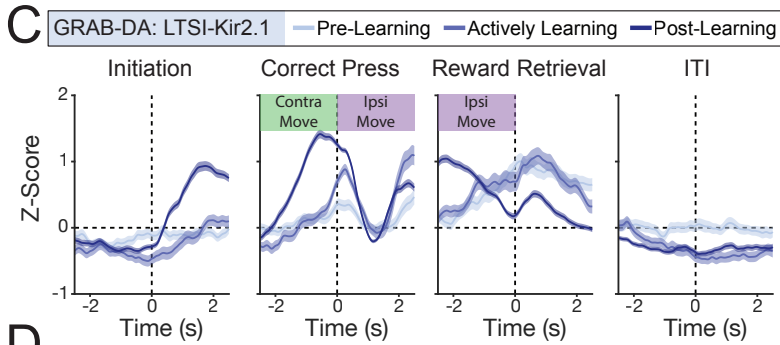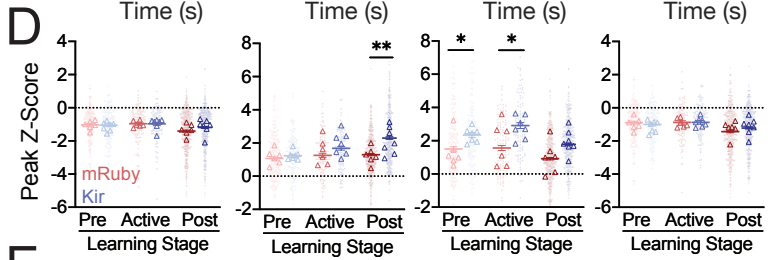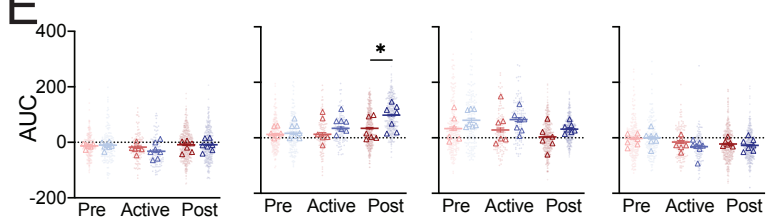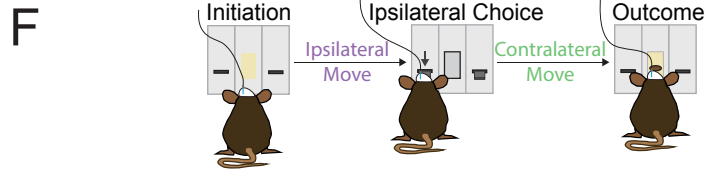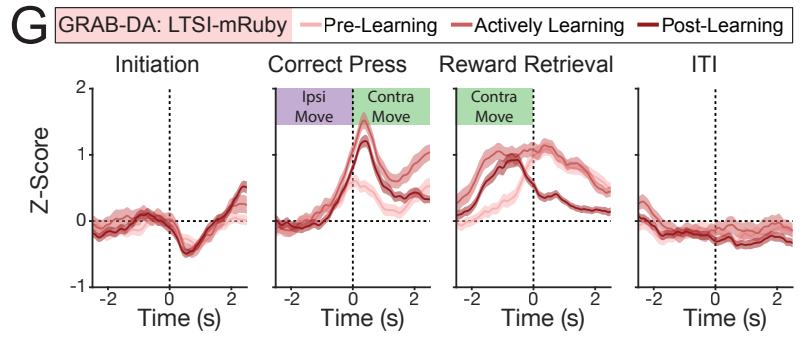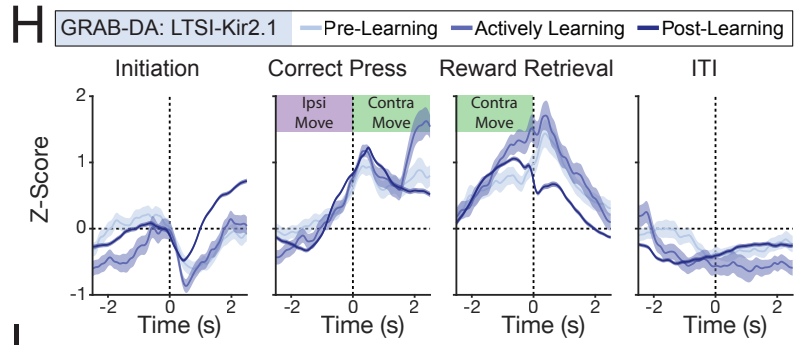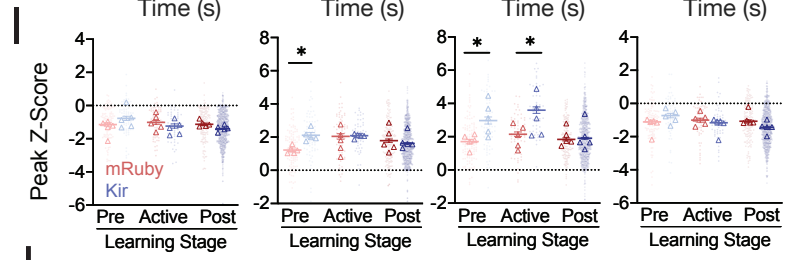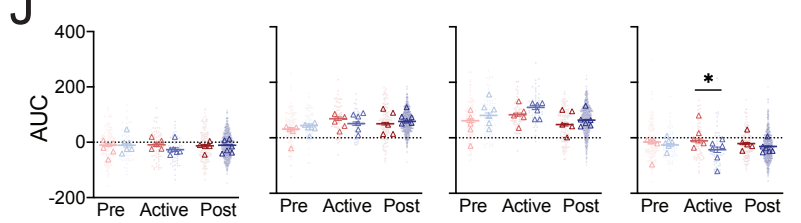

**Figure S2. LTSl inhibition amplifies dopamine signals as mice make contralateral movements; related to Figure 2.** (A) As mice press a lever contralateral to the striatal implant, they make a contralateral movement towards the lever followed by an ipsilateral movement towards the reward magazine. (B) Peri-event temporal histograms (PETHs) for initiations, correct presses, reward retrievals, and ITIs of pre-learning, actively learning, and post-learning trials for LTSl-mRuby control mice training to press the lever contralateral to the striatal implant (n=6). (C) PETHs for the same behavioral events for LTSl-Kir2.1 inhibited mice training to press the lever contralateral to the implant (n=7). (D) Peak (minima for initiation and ITI, maxima for correct press and reward retrieval) Z-scores relative to the signal at the end of the ITI. (E) Total areas under the curve (AUC) in the window of 1s before and after the behavioral event. (F) As mice press a lever ipsilateral to the striatal implant, they make an ipsilateral movement towards the lever followed by a contralateral movement towards the reward magazine. (G) Peri-event temporal histograms (PETHs) for initiations, correct presses, reward retrievals, and ITIs of pre-learning, actively learning, and post-learning trials for LTSl-mRuby control mice training to press the lever ipsilateral to the striatal implant (n=5). (H) PETHs for the same behavioral events for LTSl-Kir2.1 inhibited mice training to press the lever ipsilateral to the implant (n=5). (I) Peak (minima for initiation and ITI, maxima for correct press and reward retrieval) Z-scores relative to the signal at the end of the ITI. (J) Total areas under the curve (AUC) in the window of 1s before and after the behavioral event. \*p<0.05, \*\*p<0.01, \*\*\*p<0.001 vs mRuby control for same learning stage. Lines in dot plots represent means; dots represent individual trials and open triangles represent animal means. All PETH data represented as mean  $\pm$  SEM. See Data S1 for detailed statistics.



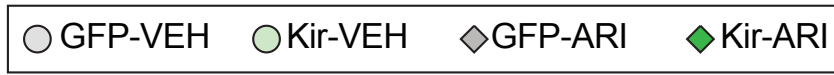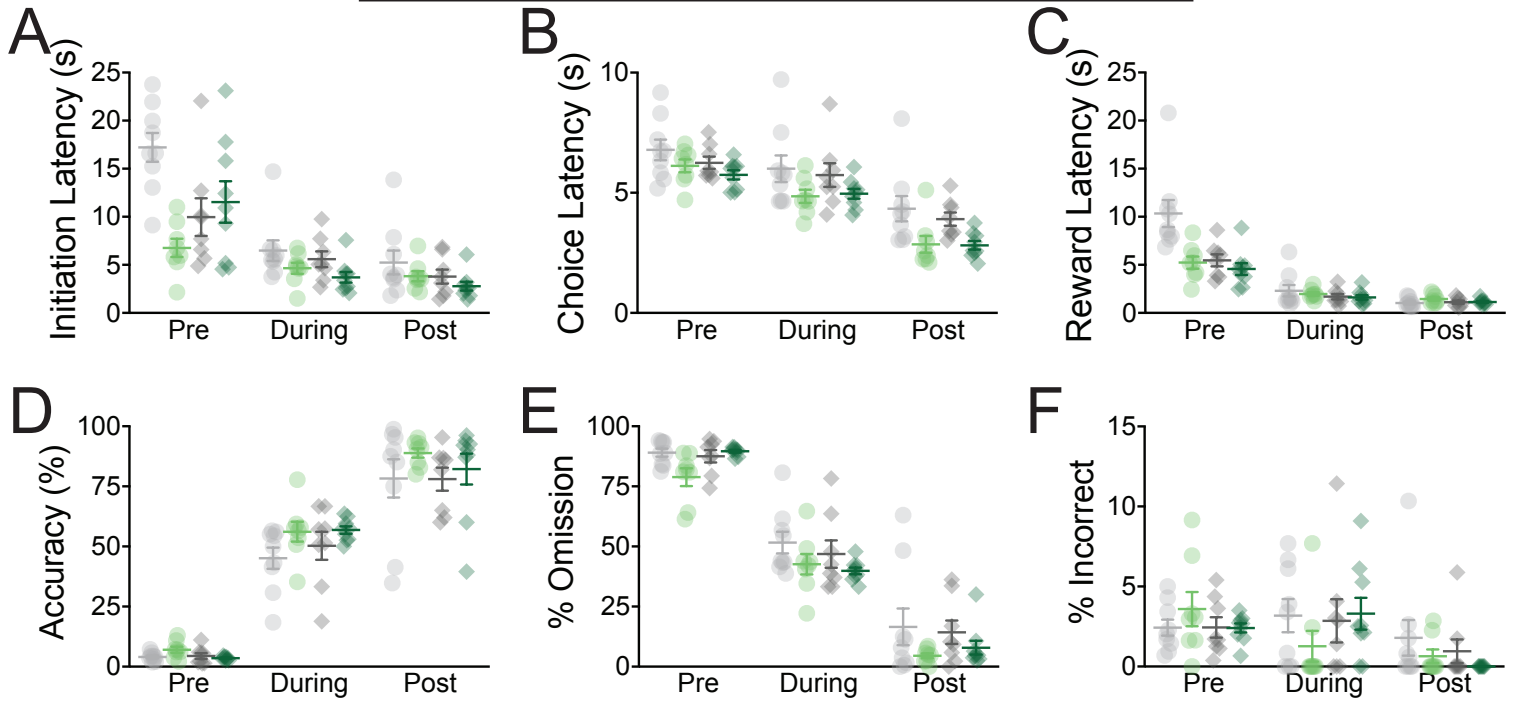

**Figure S3. Intra-striatal dopamine D2 partial agonism prevents effects of LTSI inhibition on learning; related to Figure 3.** (A-C) Latencies to (A) initiate, (B) lever press, and (C) retrieve reward across learning stages. (D-F) Proportions of (D) correct presses, (E) omitted responses, and (F) incorrect lever presses across learning stages. All box and whiskers data represented as median  $\pm$  interquartile range, with whiskers showing entire spread. See Data S1 for detailed statistics.
